# Supplementary material for: Ripening of Nostrano Valtrompia PDO Cheese in Different Storage Conditions: Influence on Chemical, Physical and Sensory Properties
Source: MDPI journal article supplement (doi:10.3390/foods9081101), 2020-08-12
Supplement: s1 [file s1]

# Ripening of Nostrano Valtrompia PDO Cheese in Different Storage Conditions: Influence on Chemical, Physical and Sensory Properties

Bettera, L., Alinovi, M., Mondinelli, M., Mucchetti, G.

## Supplementary material

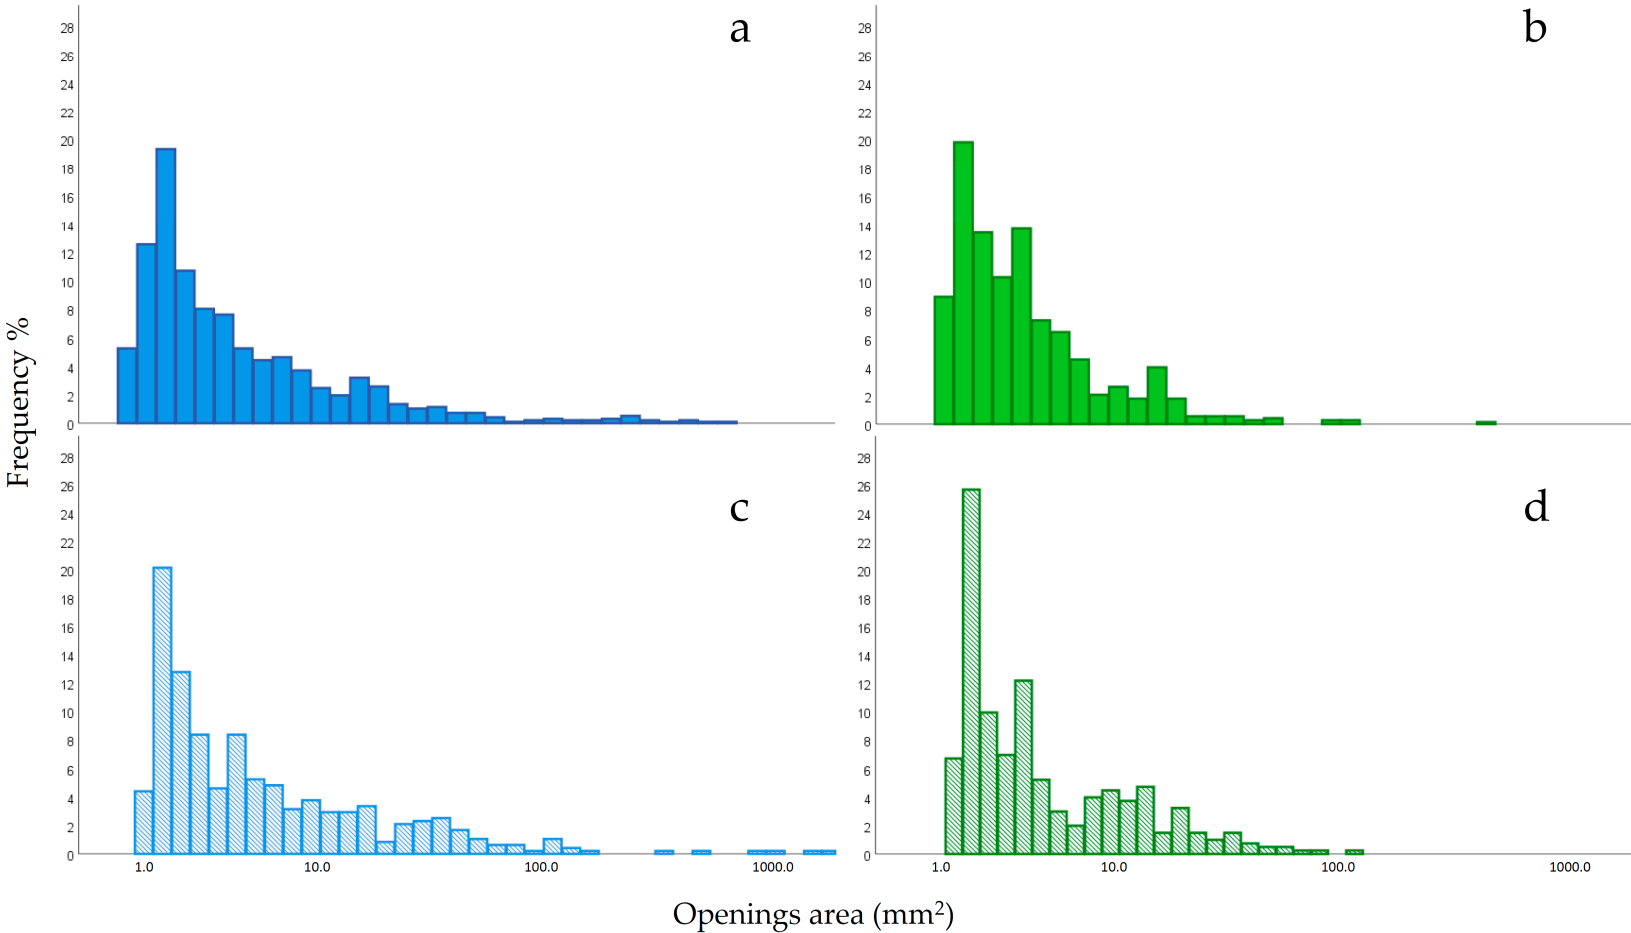

**Figure S1.** Frequency distributions (%) of Nostrano Valtrompia openings measured with image analysis. Nostrano Valtrompia cheeses were ripened for 12 and 16 months in temperature conditioned warehouse (TCW) and traditional non conditioned warehouse (TNCW). **(a)** TNCW at 12 months of ripening; **(b)** TCW at 12 months of ripening; **(c)** TNCW at 16 months of ripening; **(d)** TCW at 16 months of ripening.
